# Supplementary material for: ‘Overloading’ fluorescent silica nanoparticles with dyes to improve biosensor performance
Source: Royal Society of Chemistry journal article supplement (doi:10.1039/c7tb01284e), 2017-01-01
Supplement: c7tb01284e1.pdf [file c7tb01284e1.pdf]

## Supporting Information

‘Overloading’ fluorescent silica nanoparticles with dyes to  
improve immunoassay performance.

*Colin J. Moore,<sup>a†</sup> Giorgia Giovannini,<sup>a</sup> Filip Kunc,<sup>a</sup> Andrew J. Hall,<sup>a</sup> Vladimir Gubala,<sup>a\*</sup>*

<sup>a</sup> Medway School of Pharmacy, University of Kent, Central Ave, Chatham Maritime, Kent ME4  
4TB, United Kingdom

<sup>†</sup> FOCAS Research Institute, Dublin Institute of Technology, Kevin St, Dublin 8, Ireland

\* Corresponding author: [v.gubala@kent.ac.uk](mailto:v.gubala@kent.ac.uk)

## Contents

|                                                                                       |    |
|---------------------------------------------------------------------------------------|----|
| 1 Materials .....                                                                     | 3  |
| 2 Dye-loaded silica NP synthesis and functionalisation.....                           | 3  |
| 2.1 Water-in-oil reverse microemulsion method .....                                   | 3  |
| 2.2 Stöber method.....                                                                | 4  |
| 2.2.1 Synthesis of silica NPs ‘A FITC Stöber’, ‘A 2× Stöber’, and ‘A 5× Stöber’ ..... | 5  |
| 2.2.2 Synthesis of high-loaded NPs ‘A 10× Stöber’ .....                               | 5  |
| 2.3 Releasing dyes for loading quantification .....                                   | 5  |
| 2.4 Quantification of amino groups on the NP surface using ninhydrin .....            | 6  |
| 2.5 Creating Ab-NPs using polyaldehyde dextran as a crosslinker .....                 | 7  |
| 3 NP characterization.....                                                            | 8  |
| 3.1 Dynamic Light Scattering.....                                                     | 8  |
| 3.1.1 NPs with different dye loading .....                                            | 8  |
| 3.1.2 Dextran coated- and antibody coated-NPs .....                                   | 8  |
| 3.2 Transmission Electron Microscopy .....                                            | 8  |
| 3.2.1 Plain NP size analysis .....                                                    | 8  |
| 3.2.2 NP dissolution.....                                                             | 8  |
| 3.3 UV-Vis and fluorescence analysis.....                                             | 9  |
| 3.3.1 NPs with different dye loading .....                                            | 9  |
| 3.3.2 Quantification of dye loading .....                                             | 9  |
| 3.3.3 Ninhydrin.....                                                                  | 9  |
| 3.3.4 Quantification of antibodies per NP .....                                       | 10 |
| 3.3.5 Ab-NP dissolution studies .....                                                 | 10 |
| 3.3.6 Free FITC emission spectrum.....                                                | 10 |
| 4 Direct binding assay and subsequent Ab-NP degradation.....                          | 11 |
| 5 Supporting Data .....                                                               | 12 |

## 1 Materials

Cyclohexane (anhydrous, 99.5%), 1-hexanol (anhydrous,  $\geq 99\%$ ), Triton® X-100, aminopropyl trimethoxysilane [APTMS] (97%), tetraethyl orthosilicate [TEOS] (99.99%), ammonium hydroxide solution (28% w/v in water,  $\geq 99.99\%$ ), 3-(trihydroxysilyl)propyl methylphosphonate monosodium salt (42% w/v in water) [THPMP], fluorescein isothiocyanate isomer I ( $\geq 90\%$ ), albumin from bovine serum (lyophilised powder,  $\geq 98\%$ ), dextran (from *Leuconostoc spp*,  $M_r \sim 40,000$ ), sodium periodate (99.8%), sodium borohydride ( $\geq 99\%$ ), N,N-dimethylformamide (anhydrous, 99.8%) [DMF], IgG from human serum (reagent grade,  $\geq 95\%$ ), 4-morpholineethanesulfonic acid [MES] ( $\geq 99\%$ ), sodium carbonate ( $\geq 99.5\%$ ), sodium bicarbonate ( $\geq 99.5\%$ ), Tween®20, ethanolamine ( $\geq 98\%$ ), ninhydrin ( $\geq 99\%$ ), fetal bovine serum were purchased from Sigma Aldrich. Sodium carbonate (0.1M) combined with sodium bicarbonate (0.1M) yielded the pH8.8 (1:9 v/v respectively) and pH10.6 (9:1 v/v respectively) solutions at 37°C used for NP degradation, and are hereafter referred to as ‘pH8.8’ and ‘pH10.6’ solutions. Absolute ethanol, phosphate buffer saline tablets (one tablet dissolved in 200mL DI water yields 0.01M phosphate buffer, pH7.4) were purchased from Fisher Scientific. Hereafter, ‘PBS’ refers to 0.01M PBS, pH7.4. AlexaFluor®647 labeled goat anti-human (H+L) was purchased from Life Technologies. Transparent Nunc Maxisorb 96 well plates were purchased from Fisher Scientific.

## 2 Dye-loaded silica NP synthesis and functionalisation

**2.1 Water-in-oil reverse microemulsion method** Dye-doped silica nanoparticles were synthesized using the quaternary microemulsion method<sup>1</sup>. 2.5mg FITC dye (6.4 $\mu$ mol) and 5.6 $\mu$ L APTMS (32 $\mu$ mol) were reacted together in a dry glass vial in 2mL of 1-hexanol under constant

stirring for 5 hours under light protection. After 5 hours, the FITC-APTMS dye conjugate solution was added to cyclohexane (7.5mL), 1-hexanol (1.133mL), TritonX-100 (1.89g), DI water (480 $\mu$ L) in a 30mL polypropylene bottle under constant stirring. Because the FITC-APTMS solution was based in hexanol, additional hexanol was added such that the total volume of hexanol was consistent through the differently loaded NPs. For example, 3ww NPs used 666 $\mu$ L of dye solution. When 1ww NPs were prepared, 222 $\mu$ L of dye solution was used, followed by the addition of 444 $\mu$ L hexanol. **Table S1** shows the quantities of dye solution and additional hexanol used for each dye-loading concentration. Following the addition of dye solution, 100 $\mu$ L (i.e. 93.3mg) of TEOS was introduced. The 'w/w' values of FITC-APTMS solution added were calculated by comparing to the mass of FITC-APTMS added to the microemulsion to that of 100 $\mu$ L of TEOS. The mixture was allowed to stir for 30mins. 40 $\mu$ L ammonium hydroxide was then added to the reaction mixture to catalyze the nanoparticle synthesis reaction, and the reaction was allowed to proceed for 20 hours under light protection. TEOS (50 $\mu$ L) was added to the reaction mixture. 30mins later, 40 $\mu$ L of THPMP was added and, 5mins later, 10 $\mu$ L APTMS was introduced. To create NPs without amino functionalisation, only 40 $\mu$ L of THPMP was added. The mixture was allowed to stir for another 20 hours. The microemulsion was then broken by adding 30mL of ethanol. The nanoparticles were purified by centrifuging the solution (14,000rpm) for 10mins, removal of the supernatant and subsequent re-dispersion of the NP pellet in fresh ethanol (30mL) via sonication. This centrifuging/sonication step was repeated 3 times. The final NP dispersion was stored at 4°C under light protection.

**2.2 Stöber method** Preparation of the dye-precursor solution; The FITC-APTMS conjugate was prepared as described elsewhere<sup>2</sup>. Briefly, in a dry vial, fluorescein isothiocyanate (FITC) (39

mg, 0.1 mmol) was mixed with the stoichiometric amount of APTMS (23  $\mu$ L, 0.13 mmol) in absolute ethanol (100 mL). The mixture was stirred at 40 °C for 24 h. The appropriate amount of such prepared FITC-silane precursor solution was immediately used for NP synthesis.

**2.2.1 Synthesis of silica NPs ‘A FITC Stöber’, ‘A 2 $\times$  Stöber’, and ‘A 5 $\times$  Stöber’** For the preparation of ‘A FITC Stöber’, ‘A 2 $\times$  Stöber’, and ‘A 5 $\times$  Stöber’ FITC-loaded NPs 5 mL, 10 mL or 25 mL (respectively) from original 39 mL of absolute ethanol were replaced by equal amount of the dye precursor solution. Then TEOS (2.8 mL, 12.5 mmol) was added. The reaction was triggered by the addition of  $\text{NH}_4\text{OH}$  (2.8 mL, 25 % (w/w)) water solution was added under vigorous stirring. The reaction was allowed to proceed overnight at RT, after that the nanoparticles were collected by centrifugation at 7800 rpm for 20 min and washed with ethanol (40 mL) (3  $\times$ ).

**2.2.2 Synthesis of high-loaded NPs ‘A 10 $\times$  Stöber’** The precursor solution was prepared in 10 x higher scale – FITC (39 mg, 0.1 mmol) was dissolved in ethanol (39 mL) and APTES (23  $\mu$ L, 1.3 mmol) was added. The reaction was carried out at 40 °C overnight. After that, the mixture was allowed to cool to RT and TEOS (2.8 mL, 12.5 mmol) was added. The reaction was initiated by addition of  $\text{NH}_4\text{OH}$  (2.8 mL, 25 % (w/w)) water solution under vigorous stirring. The reaction was allowed to proceed overnight at RT, after that the nanoparticles were collected by centrifugation at 7800 rpm for 20 min and washed with ethanol (40 mL) (3  $\times$ )

**2.3 Releasing dyes for loading quantification** The number of dyes encapsulated in the NP loaded at 0.1, 0.25, 0.5, 1, 1.5, 2, 2.5, 3% (w/w) concentrations was quantified. NPs were degraded to release dyes from the NPs such that homo-FRET or aggregation effects could be eliminated. Fluorescein molecules would therefore be free in solution and their fluorescence could be compared to a fluorescence-based calibration curve of known FITC concentrations. 200 $\mu$ g of NPs

were suspended in 1mL of pH10.6 buffer and incubated for 5 hours at 37°C in a Ther-Mix block heater (Vital Ltd.). After 5 hours, no NP pellet was formed upon centrifugation. TEM images show that severe NP degradation could be seen after 2 hours in pH10.6 solution. It was therefore assumed that the NPs had degraded after 5 hours and fluorescein was free in solution. Using the TEM diameter of the 0.1, 0.25, 0.5, 1, 1.5, 2, 2.5 and 3% (w/w) NPs and density of silica ( $2.4\text{g cm}^{-3}$ ) it was possible to quantify the number NPs per 200 $\mu\text{g}$  of NP. Assuming the NPs were spheres, the volume of 1 NP could be calculated using the NP radius calculated from the micrographs in **Figure S2**. Using the density (i.e. mass per unit volume) of silica, the mass of 1 NP was calculated. The number of NPs per 200 $\mu\text{g}$  was then calculated. With the number of dyes and NPs known per 200 $\mu\text{g}$  of dye-loaded NPs, the quantity of dyes per NP could be found.

**2.4 Quantification of amino groups on the NP surface using ninhydrin** In order to find the maximum Ruhemann's Purple absorbance wavelength, a preliminary experiment using ethanolamine was carried out. In an Eppendorf tube, 200 $\mu\text{L}$  of 19.1mM ninhydrin was mixed with 200 $\mu\text{L}$  of 191mM ethanolamine (both in ethanol) for 15 minutes at 65°C in the block heater (whilst covered with aluminum foil). The solution began to turn purple in colour after 5 mins, but was allowed to turn a stronger purple by being left for a total of 15mins. The sample was then removed from the block heater. 120 $\mu\text{L}$  of the solution was taken and an absorbance scan from 450-800nm was performed. The maximum absorbance for Ruhemann's purple was at 580nm. Using the NPs, 1mg of NPs in 200 $\mu\text{L}$  ethanol was mixed with 200 $\mu\text{L}$  of 19mM ninhydrin in ethanol for 15mins at 65°C in a block heater. The NPs were then centrifuged (14,000rpm, 8 minutes) and the supernatant was collected. 100 $\mu\text{L}$  was added to the wells and the absorbance read at 580nm. A calibration curve using APTMS was prepared in order to quantify the average number of amino

groups per NPs. 200 $\mu$ L of APTMS of different concentrations (in ethanol) was mixed with 200 $\mu$ L 19mM ninhydrin (in ethanol) for 15mins at 65°C.

**2.5 Creating Ab-NPs using polyaldehyde dextran as a crosslinker** We have previously reported the use of polyaldehyde dextran for the attachment of proteins to silica nanoparticles<sup>3</sup>. Briefly, 500 $\mu$ L of 40 mM of sodium periodate (in DI water) was added to 1 $\mu$ mol 40 kDa dextran in a 2 mL centrifuge tube and shaken at 600 rpm for 90mins. The dextran solution was then added to 1mg of NP pellet, ultrasonicated to redisperse the NP in the solution and shaken for 60mins. 500 $\mu$ L of 40 mM of sodium borohydride (in DMF) was added directly into the NP– dextran solution, which was then shaken for 25mins. The sample was then centrifuged (14 000 rpm, 8 min, x2). The NP pellet was dispersed (via ultrasonication) in DI water after the first centrifugation. This was the most effective way of binding dextran to the NPs. After the second centrifugation, the pellet was re-dissolved in 500 $\mu$ L of 40mM of sodium periodate to further oxidize dextran. The dextran-coated NPs were shaken for 30 min (600 rpm), and then centrifuged (14 000 rpm, 8 min, x2). After the second centrifugation, 484 $\mu$ L 0.1M MES pH 4.2 was added to the pellet and sonicated. AlexaFluor647 antibody (16 $\mu$ L, 2mg mL<sup>-1</sup>) was added and shaken for 4h (600 rpm). 500 $\mu$ L of 40 mM sodium borohydride (in DMF) was added directly into the tube and allowed shake for another 40 min. To purify the antibody-coated NPs, the sample was centrifuged for 8 min at 14 000 rpm, sonicated using an ultrasonic bath and re-dispersed in 1mL PBS (x4). After the final centrifugation, the antibody-coated NPs were re-dispersed in 500 $\mu$ L DI water (2mg mL<sup>-1</sup>). The particles were then frozen using liquid nitrogen (200 $\mu$ g per aliquot) in a 1% (w/v) solution of BSA (i.e. 100 $\mu$ L of antibody-coated NPs + 100 $\mu$ L 2%(w/v) BSA). Once frozen, the aliquots were then lyophilized overnight in a using a ScanVac Coolsafe freeze drier connected to an Edwards RV12 pump. When dry, the Ab-NP samples were stored at -20°C until further use.

## 3 NP characterization

### 3.1 Dynamic Light Scattering

**3.1.1 NPs with different dye loading** The plain NPs of different FITC loading and Ab-NPs were dispersed at a concentration of  $0.1 \text{ mg mL}^{-1}$  in DI water. Their size (Z-average) and zeta potentials were analysed in a disposable folded capillary cell using Malvern Zetasizer. A minimum of 30 measurements for size and zeta potential was performed for all samples ( $N \geq 3$ ).

**3.1.2 Dextran coated- and antibody coated-NPs** Dextran coated- and antibody-coated NPs were suspended in water ( $0.1 \text{ mg mL}^{-1}$ ), and size (Z-average) and zeta potential were measured under similar conditions to those mentioned above.

### 3.2 Transmission Electron Microscopy

**3.2.1 Plain NP size analysis** NPs with different dye loading;  $3 \mu\text{L}$  of NPs in water ( $500 \mu\text{g/mL}$ ) was added on ‘Carbon Films on 400 Mesh Grids Copper’ (Agar Scientific) and allowed to evaporate. Images were taken on a Joel JEM-3200FS transmission electron microscope at  $100 \text{ kV}$  magnification. Using ImageJ software, at least 100 NPs per image were analysed statistical values for NP diameter.

**3.2.2 NP dissolution** Plain NPs ( $50 \mu\text{g mL}^{-1}$ ,  $2 \text{ mL}$  total volume) were incubated in DI water,  $\text{pH} 8.8$  or  $\text{pH} 10.6$  solutions at  $37^\circ\text{C}$  over time. After particular time points (0h, 2h, 4h), NPs were centrifuged ( $14,000 \text{ rpm}$ , 10mins), supernatant was removed and pellet re-suspended in DI water. Two repetitions centrifuging/re-dispersal in DI water were required to remove salts from the solution. ‘Clean’ NPs were redispersed in  $150 \mu\text{L}$  DI water before being added to TEM grids.  $3 \mu\text{L}$



of cleaned NP sample in DI water was added to the TEM grids and allowed to evaporate. DI water was allowed to evaporate and the grids were inserted into the TEM for imaging.

### 3.3 UV-Vis and fluorescence analysis

A Tecan Infinite M200 Pro Safire microplate reader was used for the majority of absorbance and fluorescence emission measurements. Samples were added to Nunc Maxisorb 96 well plates before being read.

**3.3.1 NPs with different dye loading** NPs in DI water (1mg/mL, 100 $\mu$ L per well) were added to the microwell plate and absorbance/fluorescence emission spectra were obtained. A scan range of 400-600nm, and a wavelength step size of 1nm, was employed for the absorbance spectra measurements. For fluorescence emission scans, an excitation wavelength of 436nm was used to scan from 475-600nm with a wavelength step size of 1nm and a gain setting of 55.

**3.3.2 Quantification of dye loading** 100 $\mu$ L of degraded NP solution (which therefore contained fluorescein released from the NPs) was added to microwells and fluorescence emission intensity was read at  $\lambda_{\text{ex}}/\lambda_{\text{em}} = 490/525\text{nm}$ , gain 60). These values were compared to a calibration curve of free FITC in pH10.6 solution.

**3.3.3 Ninhydrin** To find the absorbance maximum for Ruhemann's Purple, 100 $\mu$ L of ninhydrin-ethanolamine reaction was added to the wells of a 96 well plate and absorbance was read from 450nm-800nm (1nm step size). For ninhydrin-NP reaction, 100 $\mu$ L of supernatant was added to the wells of a 96 well plate and absorbance read at 580nm (the absorbance maximum of Ruhemann's Purple).

**3.3.4 Quantification of antibodies per NP** 60 $\mu$ L of purified Ab-NP<sub>OPTIMUM</sub> and Ab-NP<sub>OVERLOADED</sub> was added to 96 well plates, and readings for AlexaFluor647 ( $\lambda_{\text{ex}}/\lambda_{\text{em}} = 647/677\text{nm}$ , gain 110) and fluorescein ( $\lambda_{\text{ex}}/\lambda_{\text{em}} = 490/525\text{nm}$ , gain 55) were used to quantify antibody and NP concentration respectively. These readings were then compared to calibration curves for AlexaFluor647 goat anti-human IgG and FITC-doped nanoparticles. The concentration of antibodies and NPs per well could then be calculate the mass of antibody per mass of NP.

**3.3.5 Ab-NP dissolution studies** The change in fluorescein fluorescence intensity of Ab-NP<sub>OPTIMUM</sub> and Ab-NP<sub>OVERLOADED</sub> was monitored as an indicator of NP degradation. Freeze dried Ab-NPs were removed from the freezer and redispersed in DI water and centrifuged. The supernatant was removed (presumably containing free BSA). The Ab-NP pellets were redispersed in DI water, pH8.8 or pH10.6 solution and added to microwells (10 $\mu$ g/mL or 50 $\mu$ g/mL, 100 $\mu$ L per well). The plate was then added to the microwell plate reader and fluorescein fluorescence intensity read over time. Each well was read at  $\lambda_{\text{ex}}/\lambda_{\text{em}} = 490/525\text{nm}$  with a gain setting of 75 at 10min intervals. Room temperature measurement were performed without heating, while 37 $^{\circ}\text{C}$  analysis involved utilizing the plate reader heating capability at 37  $^{\circ}\text{C}$  for the duration of the measurement. Between measurements the plate was shaken inside the microwell plate reader (orbital shaking frequency of 6mm).

**3.3.6 Free FITC emission spectrum** A Varian Cary Eclipse Fluorescence Spectrophotometer was used to obtain the emission profiles of free FITC in pH7 DI water, pH8.8 and pH10.6. Using a quartz cuvette, a FITC (2.5 $\mu$ g/mL) emission scan from 470-600nm was performed at  $\lambda_{\text{ex}} = 455\text{nm}$  using a scan rate of 600nm/min and a gain of 500V.

## 4 Direct binding assay and subsequent Ab-NP degradation

60 $\mu$ L of human IgG solution in PBS [50nM, 5nM or 0.5nM] was added to the wells of a 96 well plate. 60 $\mu$ L of 1% BSA (w/v) in PBS was added to separate wells as a control as BSA exhibits low non-specific binding. Fluorescent signal generated from these wells solely coated with BSA was considered 'noise'. The plate was incubated at 4°C overnight. The plate was then cleaned by washing each well 5 times (PBS, Tween (0.2% v/v) in PBS, PBS, Tween/PBS, PBS). All wells were then blocked with 120  $\mu$ L of 1% (w/v) BSA solution and incubated at 37°C for 2 h. The same well cleaning procedure was used as before. 60 $\mu$ L of 200 $\mu$ g/mL of 2 types of freeze dried Ab-NPs [Ab-NP<sub>OPTIMUM</sub> and Ab-NP<sub>OVERLOADED</sub>] were redispersed in whole FBS, then incubated with the human IgG- or BSA-functionalised wells overnight at 4°C. The wells were then cleaned as mentioned before. Following cleaning, 100 $\mu$ L of either DI water, pH8.8 solution or pH10.6 solution at 37°C was added to the wells with the hypothesis that any Ab-NPs present in the wells would degrade to release fluorescein into solution. Fluorescein was read at  $\lambda_{\text{ex}}/\lambda_{\text{em}} = 490/525\text{nm}$  and a gain setting of 75 at approximately 7min intervals. Between measurements the plate was shaken inside the microwell plate reader (orbital shaking frequency of 6mm). Readings for fluorescein were taken overtime with the plate lid on the plate to avoid sample evaporation. Signal-to-Noise ratios were calculated by dividing positive fluorescent signal Ab-NPs with human IgG by the non-specific binding of Ab-NPs with BSA. At least 4 replicates of the direct binding assay (and subsequent Ab-NP degradation) was performed.

## 5 Supporting Data

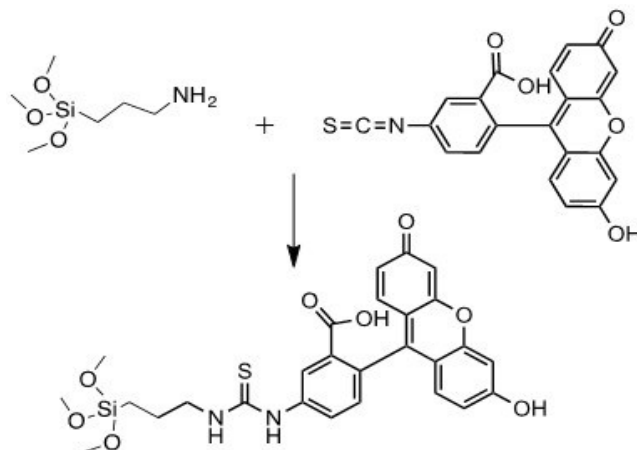

**Figure S1.** Reacting APTMS with FITC resulted in a FITC-APTMS conjugate linked through a thiourea bond. The methoxysilane groups of FITC-APTMS allowed covalent attachment of the dye conjugate into the silica matrix.

**Table S1.** Fluorescein-loaded silica NPs were prepared by the water-in-oil reverse microemulsion method. FITC-APTMS conjugate was prepared in hexanol and added to the reverse microemulsion method as a %weight of TEOS. Because 3ww used 666  $\mu\text{L}$  of FITC-APTMS solution (in hexanol), additional hexanol was added to NP batches prepared with 0ww-2.5ww FITC-APTMS such that the total amount of hexanol in each NP batch was the same. Thus the only difference between the NPs batches was the amount of FITC-APTMS.

| NP name | % weight vs. TEOS <sup>a)</sup> | Volume of FITC-APTMS added to microemulsion [ $\mu\text{L}$ ] | Volume of additional 1-hexanol [ $\mu\text{L}$ ] | Corresponding mass of FITC-APTMS added to microemulsion [mg] | Volume of additional 1-hexanol [ $\mu\text{L}$ ] |
|---------|---------------------------------|---------------------------------------------------------------|--------------------------------------------------|--------------------------------------------------------------|--------------------------------------------------|
| 0ww     | 0                               | 0                                                             | 666.0                                            | 0                                                            | 666.0                                            |
| 0.1ww   | 0.1                             | 22.2                                                          | 643.8                                            | 0.09                                                         | 643.8                                            |
| 0.25ww  | 0.25                            | 55.5                                                          | 610.5                                            | 0.23                                                         | 610.5                                            |
| 0.5ww   | 0.5                             | 111.0                                                         | 555.0                                            | 0.46                                                         | 555.0                                            |
| 1ww     | 1                               | 222.0                                                         | 444.0                                            | 0.91                                                         | 444.0                                            |
| 1.5ww   | 1.5                             | 333.0                                                         | 333.0                                            | 1.37                                                         | 333.0                                            |
| 2ww     | 2                               | 444.0                                                         | 222.0                                            | 1.82                                                         | 222.0                                            |
| 2.5ww   | 2.5                             | 555.0                                                         | 111.0                                            | 2.28                                                         | 111.0                                            |
| 3ww     | 3                               | 666.0                                                         | 0                                                | 2.74                                                         | 0                                                |

<sup>a)</sup>100  $\mu\text{L}$  of TEOS equals 93.3 mg;

**Table S2.** Hydrodynamic diameter and zeta potential analysis of the differently dye-doped silica NPs was performed using a Malvern Zetasizer in DI water. All NPs were approximately the same size and, based on their zeta potential values, are colloiddally stable. The incorporation of FITC-APTMS into the NP core does not appear to influence the resultant NPs and the reverse microemulsion system must therefore be dependant largely on other factors such as the water-to-surfactant ratio. The polydispersity index (PDI) also indicates that the NPs are monodisperse. TEM micrographs (**Figure S2**) supports the DLS data in demonstrating the NPs are all similar in size.

| NP name | Dye Loading %<br>(w/w) | Dynamic Light Scattering  |               |                     | TEM           |
|---------|------------------------|---------------------------|---------------|---------------------|---------------|
|         |                        | Diameter (Z-average) [nm] | PDI           | Zeta Potential [mV] | Diameter [nm] |
| 0ww     | 0                      | 109 ± 11                  | 0.133 ± 0.029 | -45 ± 2             | 47 ± 6        |
| 0.1ww   | 0.1                    | 110 ± 2                   | 0.113 ± 0.034 | -46 ± 2             | 53 ± 5        |
| 0.25ww  | 0.25                   | 113 ± 2                   | 0.083 ± 0.009 | -45 ± 3             | 52 ± 6        |
| 0.5ww   | 0.5                    | 109 ± 7                   | 0.078 ± 0.011 | -43 ± 4             | 51 ± 6        |
| 1ww     | 1                      | 112 ± 8                   | 0.103 ± 0.014 | -48 ± 3             | 46 ± 6        |
| 1.5ww   | 1.5                    | 110 ± 4                   | 0.108 ± 0.026 | -46 ± 4             | 49 ± 6        |
| 2ww     | 2                      | 116 ± 2                   | 0.099 ± 0.015 | -47 ± 2             | 49 ± 6        |
| 2.5ww   | 2.5                    | 114 ± 2                   | 0.085 ± 0.024 | -48 ± 1             | 50 ± 5        |
| 3ww     | 3                      | 113 ± 12                  | 0.091 ± 0.021 | -47 ± 2             | 52 ± 8        |

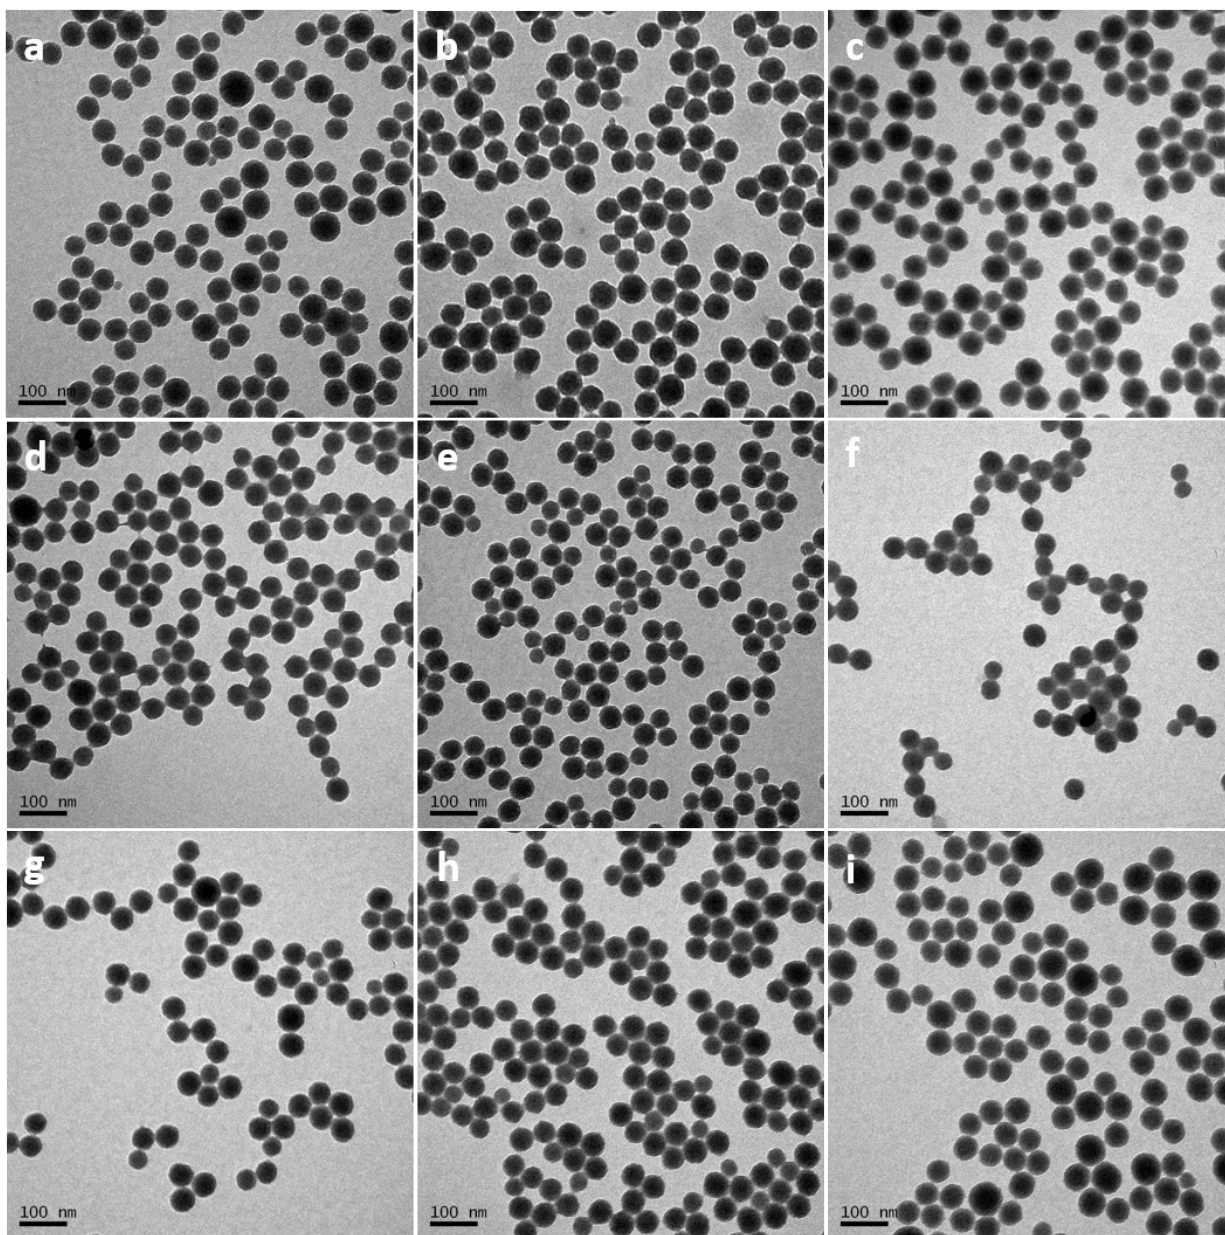

**Figure S2.** Transmission electron micrographs (100 kV accelerating voltage) of differently dye-loaded NPs. (a) 0ww (b) 0.1ww (c) 0.25ww (d) 0.5ww (e) 1ww (f) 1.5ww (g) 2ww (h) 2.5ww (i) 3ww. All NPs were spherical and there was no apparent change in NP size when different amounts of FITC-APTMS conjugate solution was used in the reverse microemulsion synthesis system. The average diameters for the NPs was (a)  $47\pm 6$  nm (b)  $53\pm 5$  nm (c)  $52\pm 6$  nm (d)  $51\pm 6$  nm (e)  $46\pm 6$  nm (f)  $49\pm 6$  nm (g)  $49\pm 6$  nm (h)  $50\pm 5$  nm (i)  $52\pm 8$  nm

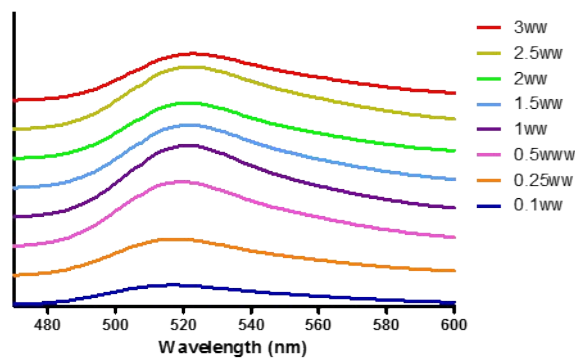

**Figure S3.** Increasing dye-loading led to a red-shifting of the emission wavelength peak.

**Table S3.** Ninhydrin reaction was used to quantify the number of  $\text{-NH}_2$  groups present on the surface of the 1ww NPs ( $\text{NP}_{\text{OPTIMUM}}$ ) and 3ww NPs ( $\text{NP}_{\text{OVERLOADED}}$ ). Assuming the NPs were spheres, the number of DDNPs per 1 mg could be calculated as per the Section 2.2 of the main article. The surface area of 1 NP was also calculated using the radius of the micrographs. Using these data it was possible to calculate the number of  $\text{-NH}_2$  per  $\text{nm}^2$  of 1 NP (based on Ruhemann's Purple absorbance). The calculations show that there was little variation in  $\text{-NH}_2$  coverage between the 1ww and 3ww NPs. The ratio of polyaldehyde dextran crosslinker to  $\text{-NH}_2$  on the NP surface and shows that there is a large excess of linker per reactive amine.

| NP name | Number of NPs per 1mg | 'Moles' of NPs per 1mg [pmol] | Surface area of 1 NP [ $\text{nm}^2$ ] | $\text{NH}_2$ per 1mg of NPs [nmol] | $\text{NH}_2$ molecules per $\text{nm}^2$ of NP surface | Dextran: $\text{NH}_2$ during linker attachment |
|---------|-----------------------|-------------------------------|----------------------------------------|-------------------------------------|---------------------------------------------------------|-------------------------------------------------|
| 1ww     | $8.17 \times 10^{12}$ | 13.6                          | 6648                                   | $72.9 \pm 27.7$                     | $0.8 \pm 0.3$                                           | $14 \pm 5$                                      |
| 3ww     | $5.67 \times 10^{12}$ | 9.4                           | 8495                                   | $47.8 \pm 12.0$                     | $0.6 \pm 0.2$                                           | $21 \pm 5$                                      |

**Table S4.** Dynamic light scattering was used to follow the progress of the size (Z-average) and zeta potential of the NPs during dextran and antibody attachment. Fluorescence analysis allow for the mass of Alexa647-labelled antibodies per mass of fluorescein-doped NPs to be calculated.

| Dye Loading                        | NP type                | Size (Z-average) [nm] | PDI               | Zeta Potential [mV] | Antibodies per NP [ $\mu\text{g}/\text{mg}$ ] |
|------------------------------------|------------------------|-----------------------|-------------------|---------------------|-----------------------------------------------|
| 1ww<br>(NP <sub>OPTIMUM</sub> )    | NP                     | 112 $\pm$ 8           | 0.103 $\pm$ 0.014 | -48 $\pm$ 3         | -                                             |
|                                    | NP + Linker            | 119 $\pm$ 6           | 0.187 $\pm$ 0.012 | -23 $\pm$ 3         | -                                             |
|                                    | NP + Linker + Antibody | 152 $\pm$ 12          | 0.266 $\pm$ 0.058 | -33 $\pm$ 4         | 3.39 $\pm$ 0.36                               |
| 3ww<br>(NP <sub>OVERLOADED</sub> ) | NP                     | 113 $\pm$ 12          | 0.091 $\pm$ 0.021 | -47 $\pm$ 2         | -                                             |
|                                    | NP + Linker            | 127 $\pm$ 9           | 0.145 $\pm$ 0.039 | -22.1 $\pm$ 1       | -                                             |
|                                    | NP + Linker + Antibody | 166 $\pm$ 3           | 0.214 $\pm$ 0.021 | -33 $\pm$ 3         | 3.17 $\pm$ 0.86                               |

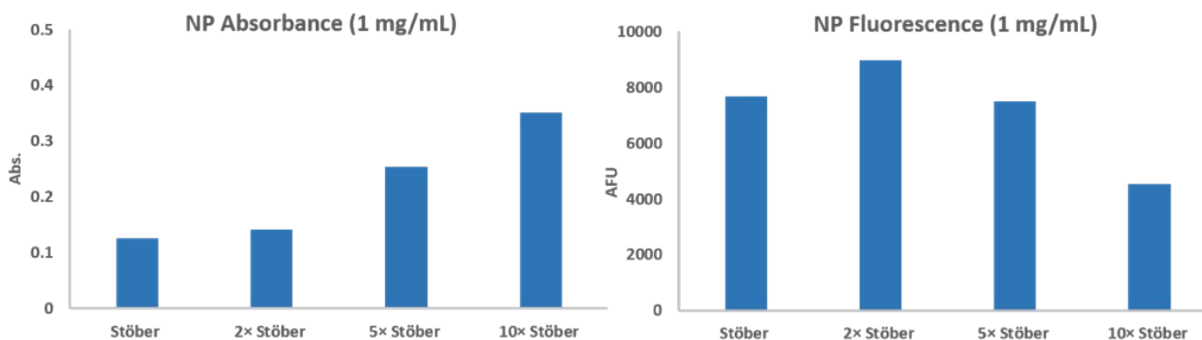

**Figure S4.** Absorbance and emission spectra of FITC-doped silica NPs produced using the Stöber method. Adding more dye-conjugate during synthesis led to a greater absorbance, and presumably more dyes per NP. However, maximal fluorescence emission was observed for ‘2×’ Stöber NPs. The reduced emission intensity for ‘5×’ and ‘10×’ loading occurred to self-quenching caused by FITC ‘overloading’.



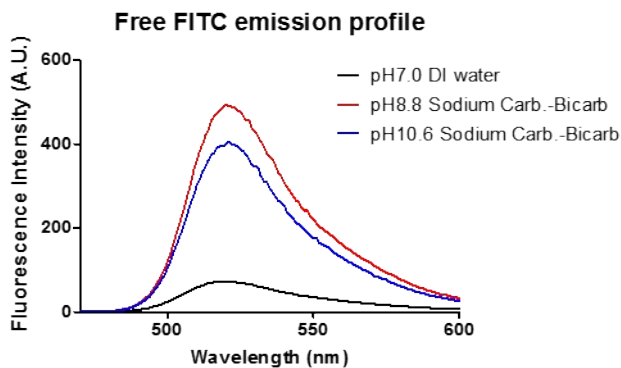

**Figure S5.** Graph of FITC (2.5µg/mL) emission in water, pH 8.8 and pH 10.6

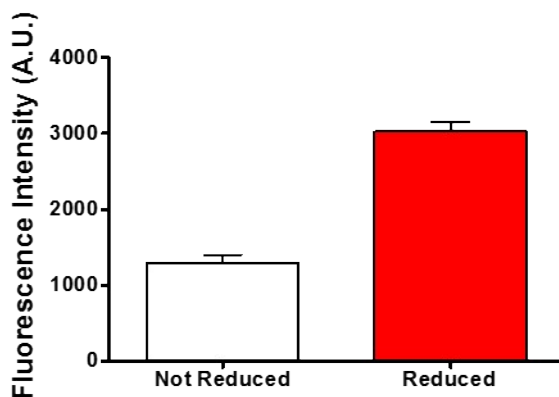

**Figure S6.** Normalised fluorescence intensity of AlexaFluor647-labelled antibodies bound to the DDNP surface. The use of a reducing step bound 2.4 times more AlexaFluor647-labelled antibodies to surface of DDNPs (red). Without reduction meant the reversible Schiff base used to link dextran and the protein was not stabilized, and less antibody was bound to the DDNP surface (white).

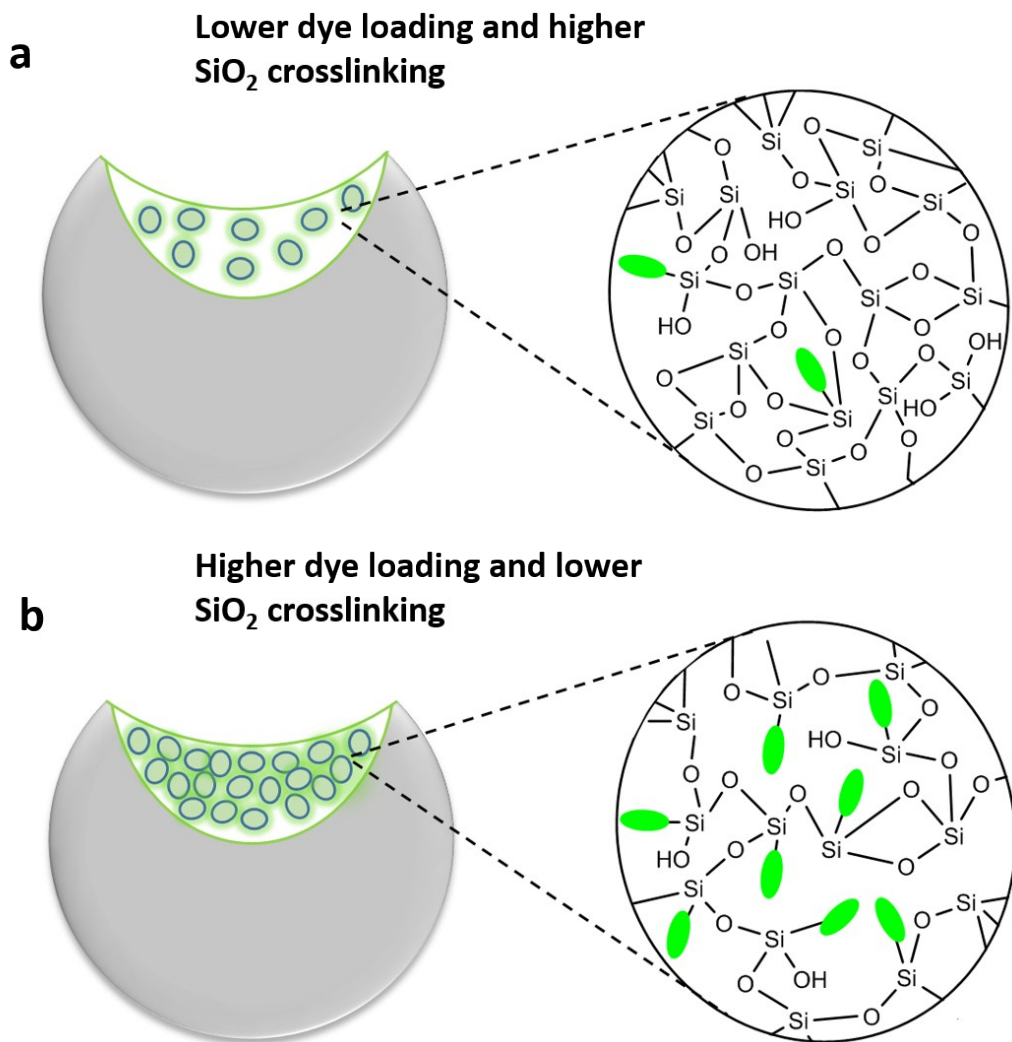

**Figure S7.** It was hypothesized that higher fluorescein-loading inside the NP core led to a reduction in O-Si-O bonds. **(a)** Lower concentrations of dye-loading led to increased hydrolysis and condensation of TEOS monomers (which have silicon atoms that can form 4 Si-O bonds), and resulted in a high density of O-Si-O bonds in the NP core. **(b)** When more FITC-APTMS was added during NP synthesis, less hydrolysed/condensed TEOS monomers are involved in NP core formation (because FITC-APTMS is also taking part). Because FITC-APTMS can only form 3 Si-O bonds, increasing the dye conjugate results in less O-Si-O units throughout the matrix.

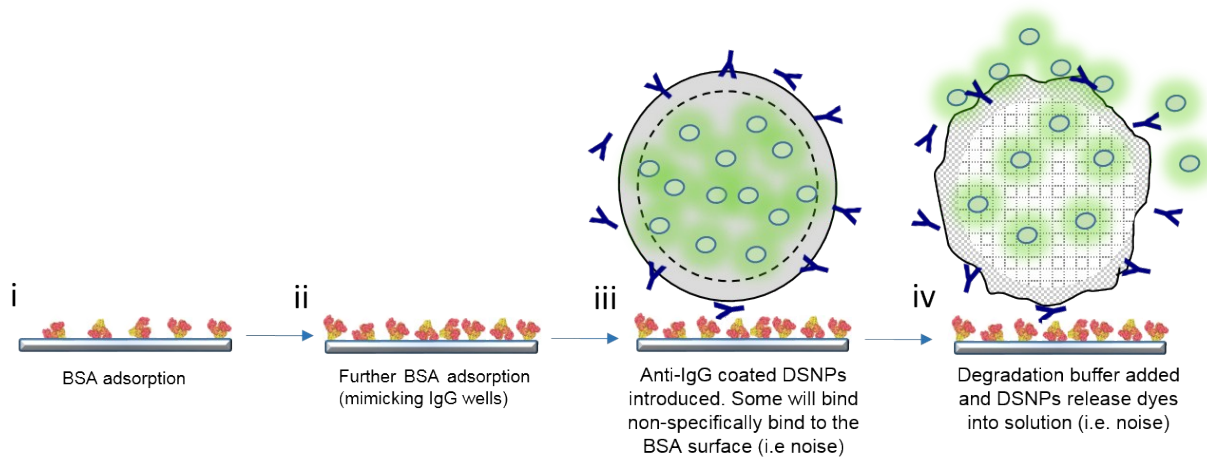

**Figure S8.** Degradation assay steps using wells solely coated with BSA. The non-specific signal detected in these wells would be considered background ‘noise’.

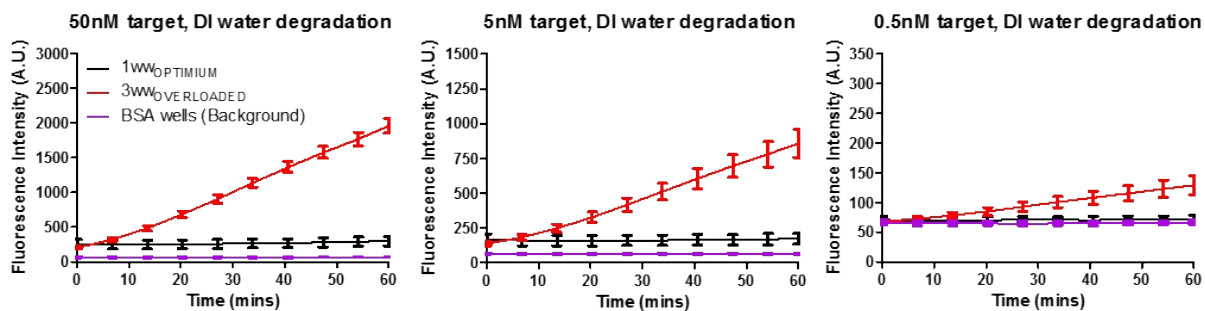

**Figure S9.** Dissolution assay with DI water as the degradation medium

**Table S5.** Dissolution assay using pH 7.0 DI water for DSNP degradation. ‘Traditional Assay’ refers Ab-NP brightness and S/N before dissolution. ‘Dissolution Assay’ refers to Ab-NP brightness and S/N after dissolution time of 60 minutes.

| Human IgG concentration |                                                                    | 50 nM                        |                                 | 5 nM                         |                                 | 0.5 nM                       |                                 |
|-------------------------|--------------------------------------------------------------------|------------------------------|---------------------------------|------------------------------|---------------------------------|------------------------------|---------------------------------|
|                         |                                                                    | Ab-<br>NP <sub>OPTIMUM</sub> | Ab-<br>NP <sub>OVERLOADED</sub> | Ab-<br>NP <sub>OPTIMUM</sub> | Ab-<br>NP <sub>OVERLOADED</sub> | Ab-<br>NP <sub>OPTIMUM</sub> | Ab-<br>NP <sub>OVERLOADED</sub> |
| Brightness              | Traditional Assay                                                  | 253.33                       | 204.63                          | 166.17                       | 136.63                          | 70.67                        | 68.38                           |
|                         | Dissolution Assay                                                  | 300.33                       | 1961.80                         | 171.50                       | 858.50                          | 72.17                        | 129.00                          |
|                         | Signal Enhancement Factor                                          | 1.19                         | 9.59                            | 1.03                         | 6.28                            | 1.02                         | 1.89                            |
| S/N                     | Traditional Assay                                                  | 3.75                         | 3.03                            | 2.46                         | 2.02                            | 1.05                         | 1.01                            |
|                         | Dissolution Assay                                                  | 4.43                         | 28.93                           | 2.53                         | 12.67                           | 1.06                         | 1.90                            |
|                         | S/N Enhancement Factor                                             | 1.18                         | 9.55                            | 1.15                         | 6.27                            | 1.01                         | 1.88                            |
|                         | Traditional <sub>OPTIMUM</sub> v Dissolution <sub>OVERLOADED</sub> | 1 : 7.71                     |                                 | 1 : 5.15                     |                                 | 1 : 1.81                     |                                 |

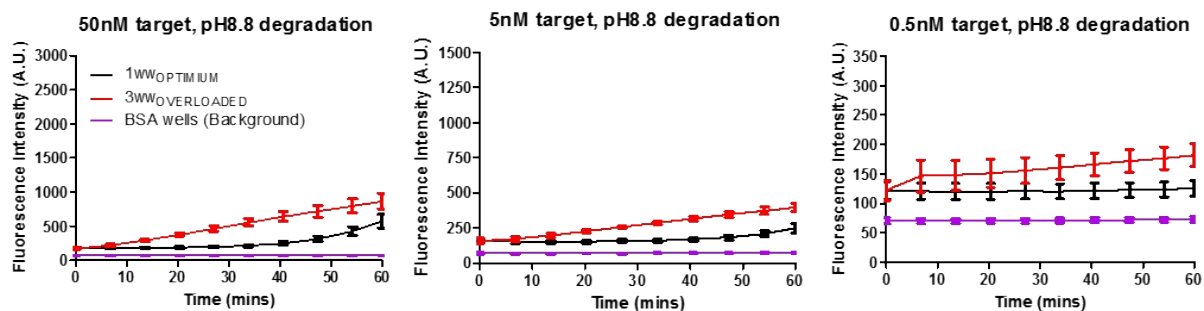

**Figure S10.** Dissolution assay with pH 8.8 as the degradation medium

**Table S6.** Dissolution assay using pH8.8 sodium carbonate-bicarbonate for DSNP degradation. ‘Traditional Assay’ refers Ab-NP brightness and S/N before dissolution. ‘Dissolution Assay’ refers to Ab-NP brightness and S/N after dissolution time of 60 minutes.

| Human IgG concentration |                                                                    | 50 nM                        |                                 | 5 nM                         |                                 | 0.5 nM                       |                                 |
|-------------------------|--------------------------------------------------------------------|------------------------------|---------------------------------|------------------------------|---------------------------------|------------------------------|---------------------------------|
|                         |                                                                    | Ab-<br>NP <sub>OPTIMUM</sub> | Ab-<br>NP <sub>OVERLOADED</sub> | Ab-<br>NP <sub>OPTIMUM</sub> | Ab-<br>NP <sub>OVERLOADED</sub> | Ab-<br>NP <sub>OPTIMUM</sub> | Ab-<br>NP <sub>OVERLOADED</sub> |
| <b>Brightness</b>       | Traditional Assay                                                  | 185.11                       | 170.33                          | 157.78                       | 158.67                          | 121.89                       | 122.22                          |
|                         | Dissolution Assay                                                  | 576.88                       | 876.00                          | 250.56                       | 397.56                          | 125.78                       | 181.50                          |
|                         | Signal Enhancement Factor                                          | 3.12                         | 5.14                            | 1.59                         | 2.51                            | 1.03                         | 1.49                            |
| <b>S/N</b>              | Traditional Assay                                                  | 2.62                         | 2.41                            | 2.23                         | 2.25                            | 1.73                         | 1.73                            |
|                         | Dissolution Assay                                                  | 7.92                         | 11.91                           | 3.44                         | 5.46                            | 1.73                         | 2.48                            |
|                         | S/N Enhancement Factor                                             | 3.02                         | 4.94                            | 1.54                         | 2.43                            | 1.00                         | 1.43                            |
|                         | Traditional <sub>OPTIMUM</sub> v Dissolution <sub>OVERLOADED</sub> | 1 : 4.55                     |                                 | 1 : 2.45                     |                                 | 1 : 1.43                     |                                 |

1. R. I. Nooney, E. McCormack and C. McDonagh, *Anal. Bioanal. Chem.*, 2012, **404**, 2807-2818.

2. X. Wang, O. Ramstrom and M. D. Yan, *Chem. Commun.*, 2011, **47**, 4261-4263.
3. C. J. Moore, H. Monton, R. O'Kennedy, D. E. Williams, C. Nogues, C. Crean and V. Gubala, *J. Mater. Chem. B*, 2015, **3**, 2043-2055.
